# Supplementary material for: Regulatory association of long noncoding RNAs and chromatin accessibility facilitates erythroid differentiation
Source: PubMed Central journal article supplement — Blood Adv. 2021 Dec 10;5(23):5396–409. doi: 10.1182/bloodadvances.2021005167 (PMC9153002; doi:10.1182/bloodadvances.2021005167), 2021-12-10
Supplement: advancesADV2021005167-suppl1.pdf [file advancesADV2021005167-suppl1.pdf]

## Supplemental Methods

### Cell Culture

We isolated CD34<sup>+</sup> cells from human cord blood using EasySep™ Human CD34<sup>+</sup> Selection Kit II and tested for purity over 95% using flow cytometry. For erythroid differentiation, CD34<sup>+</sup> cells were cultured at 10<sup>5</sup> cells/ml for seven days in SFEM II medium, supplemented with 1% penicillin/streptomycin, 10 ng/ml stem cell factor, 10 ng/ml IL-3, and 3 IU/ml erythropoietin (EPO). Then, the cells were cultured at 4 × 10<sup>5</sup> cells/ml for four more days in SFEM II supplemented with stem cell factor and EPO, and cultured at 7.5 × 10<sup>5</sup> cells/ml for 3 more days in SFEM II supplemented with EPO. Human CB samples from full-term newborns were obtained from Beijing Obstetrics and Gynecology Hospital, Capital Medical University (Beijing, China) with parental consents. The subject has signed an informed consent form, and the research was approved by the ethical committee of Beijing Institute of Genomics (BIG), Chinese Academy of Sciences. To validate the functions of lncRNAs in erythropoiesis, a lentiviral overexpression system was used to overexpress *DANCR* and *PCED1B-AS1* in CD34<sup>+</sup> cells<sup>35</sup>. Cells were cultured in an incubator at 37°C with 5% CO<sub>2</sub>.

### Overexpression and knockdown of *DANCR* and *PCED1B-AS1*

The mRNA sequences of *DANCR* and *PCED1B-AS1* were obtained from NCBI and cloned into the lentiviral plasmid pHAGE-fEF-1a-IRES-ZsGreen-2. The overexpression plasmid or the empty plasmid, the packaging plasmids psPAX2 and pMD2.G were co-transfected into 293T cells at a ratio of 1:1:1. The *DANCR* and *PCED1B-AS1* shRNA were cloned into the lentiviral plasmid pSIH1-H1-puro-coGFP, The control and knockdown plasmids were co-transfected into 293T cells with the packaging plasmids pMDLg, VSVG, and pRSV-Rev at the ratio of 10:5:3:2. The cell culture medium was collected at the timepoint of 48h and 72h, and concentrated 50 times with PEG 8000 (Solarbio). The differentiated CD34<sup>+</sup> cells were infected on day 2 according to the MOI value of the virus, and the proportion of GFP-positive cells was analyzed by flow cytometry. Primer sequences used for overexpression or knockdown are shown in Supplementary Table 1 A-B.

### Dual-luciferase reporter assay

The promoter sequence of *PCED1B-AS1* (-984~+1) was amplified and cloned into PGL4.10 plasmid. JASPAR (<http://jaspar.genereg.net/>) was used to predict the GATA1 binding site (-

421~432) on the promoter. QuikChange Primer Design is used (<https://www.genomics.agilent.com/primerDesignProgram.jsp>) to design the primers for mutation and deletion. Using QuikChange Lightning (Agilent), normal plasmid is used as template to construct mutant and delete plasmids according to the method provided by the manufacturer. PGL4.10 empty plasmid and recombinant plasmid (100 ng) and internal reference plasmid PRL-TK (5 ng) were co-transfected into 293T cells ( $0.5 \times 10^5$ /well) using Lipofectamine 2000. After 48h, each well was lysed with 80  $\mu$ L 1 $\times$ Passive Lysis Buffer, 10  $\mu$ L of which was taken, and tested by a dual luciferase assay. Primer sequences used for dual luciferase assay are shown in Supplementary Table 1C.

### **Colony-forming unit assay**

Colony-forming units (CFU) were generated in a cytokine-containing methylcellulose medium (MethoCult Media H4434, StemCell Technologies) by seeding 500 cells per well with 0.6 ml medium in a 12-well plate. After 12–14 days of culturing, multi-lineage colonies were counted under an inverted microscope.

### **In vitro RNA pull-down assay**

Substrate RNA for bead immobilization was in vitro transcribed in a 20  $\mu$ L reaction mix containing 1  $\mu$ g of template DNA of *PCED1B-AS1*, 4  $\mu$ L 5x T7 transcription buffer, and 1  $\mu$ L T7 RNA polymerase mix at 37 °C for 12 h. After purification with Trizol Reagent, the transcribed RNA was labelled with Biotinylated cytidine biphosphatem to form Biotin-RNA at 16 °C overnight. Then 150  $\mu$ L Pierce Nucleic-Acid Compatible Streptavidin Magnetic Beads (Thermo fisher, Cat# 20164) was mixed with Biotin-RNA and incubated in RNA Capture buffer for 15-30 minutes. After washing the RNA-bead complex twice with Wash Buffer, we resuspend the Beads with 1 x Protein-RNA Binding Buffer. Then the RNA-bead complex was incubated by rotating with the cell extracts of differentiated CD34<sup>+</sup> cells on day 11 at 4 °C for 1h. After washing the beads 5 times, 50  $\mu$ L Biotin Elution buffer was added to elute the proteins bound to the immobilized RNAs. The recovered proteins were resolved by gradient gel electrophoresis for identification by mass spectrometry. Primer sequences used for amplification of the template DNA are shown in Supplementary Table 1D.

## Additional Figure

**Supplemental Figure 1. Number of differentially accessible peaks, genes, and lncRNAs at adjacent stages during erythroid differentiation.** The upper panel shows changes in the enhanced accessible chromatin, up-regulated genes, and lncRNAs of adjacent stages during erythroid differentiation, and the bottom panel displays the results of opposite changes.

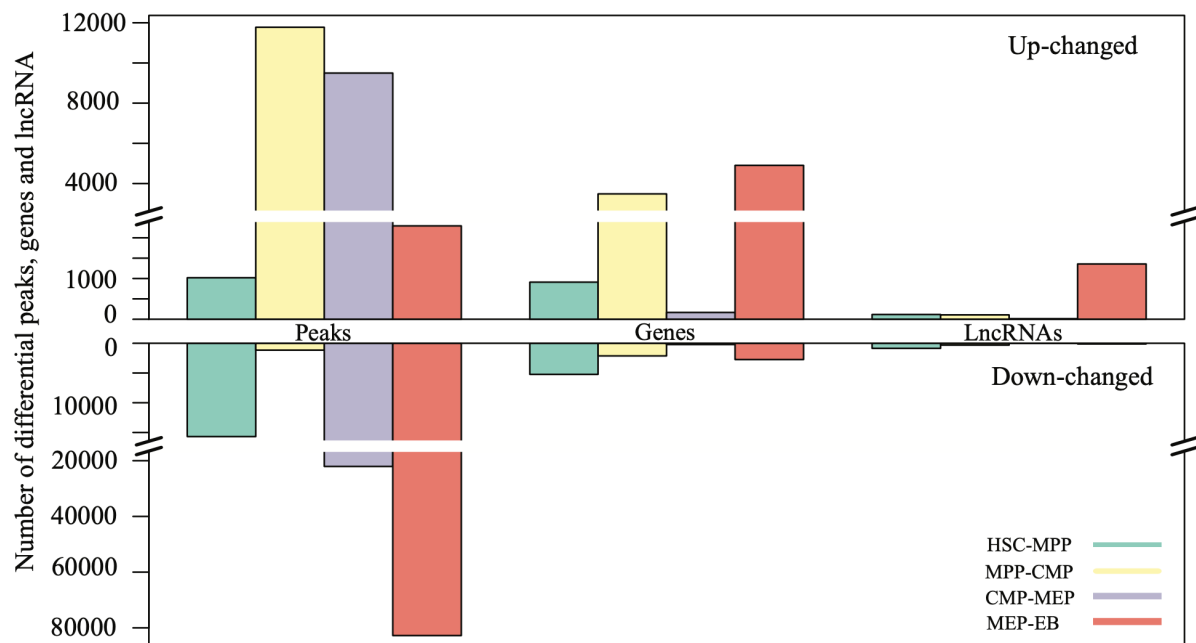

**Supplemental Figure 2. Relationship between mRNA-seq differential expression genes and chromatin accessibility change associated genes during MEP to EB.** (A). The changes of top 20 erythroid-related genes and associated chromatin accessibility during MEP to EB. (B). The changes of top 20 leukocyte activation related genes and associated chromatin accessibility of during MEP and EB. The blue bar plot represents the fold change of mRNA-seq differential genes, and the red line represents the fold change of differential peaks. Enriched function of differentially accessible chromatin (C) and expressed genes (D) during HSC differentiated into CMP.

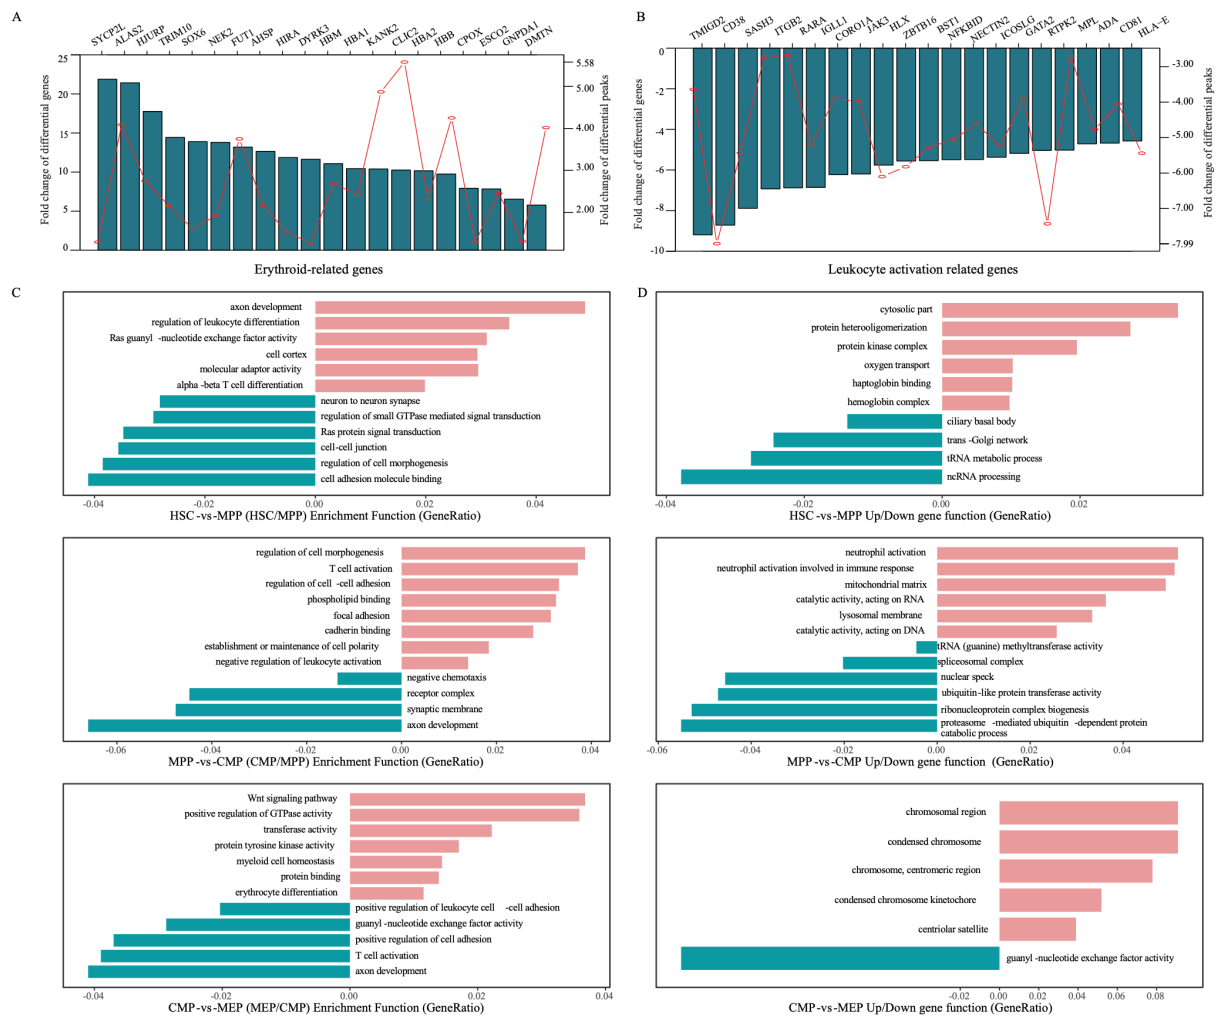

**Supplemental Figure 3. Expression of hub genes in significant modules of each stage during HSC differentiated into MEP.**

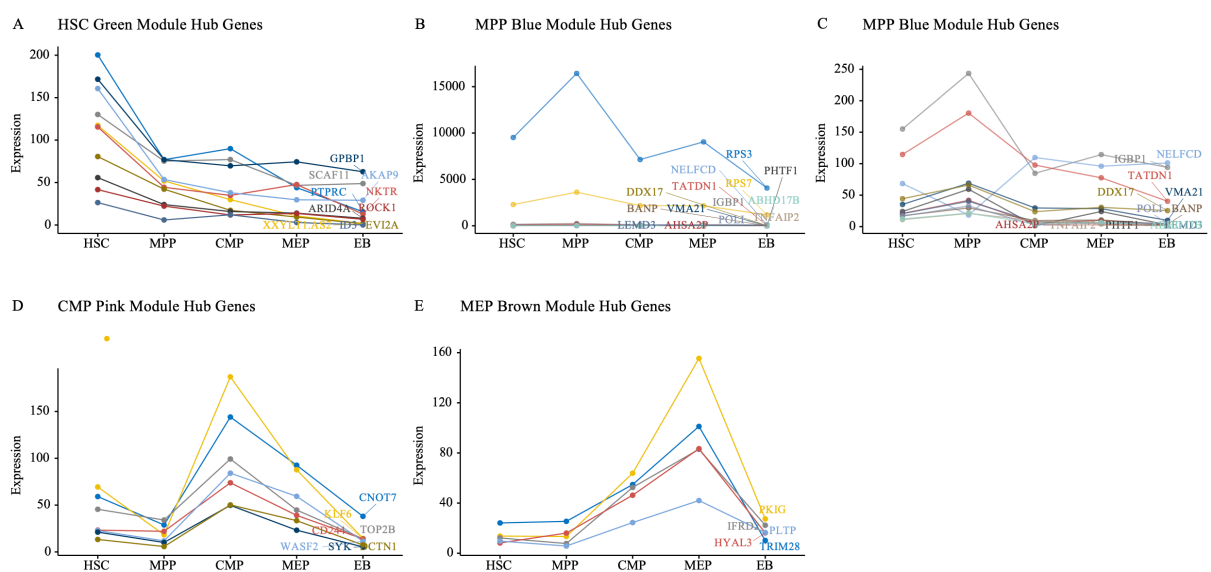

**Supplemental Figure 4. Integrative screening of lncRNAs.** The upset plot shows the number of intersecting lncRNAs among specific lncRNAs, differential lncRNAs, and genes annotated in differential accessible chromatin from HSC differentiated into MEP during erythroid differentiation.

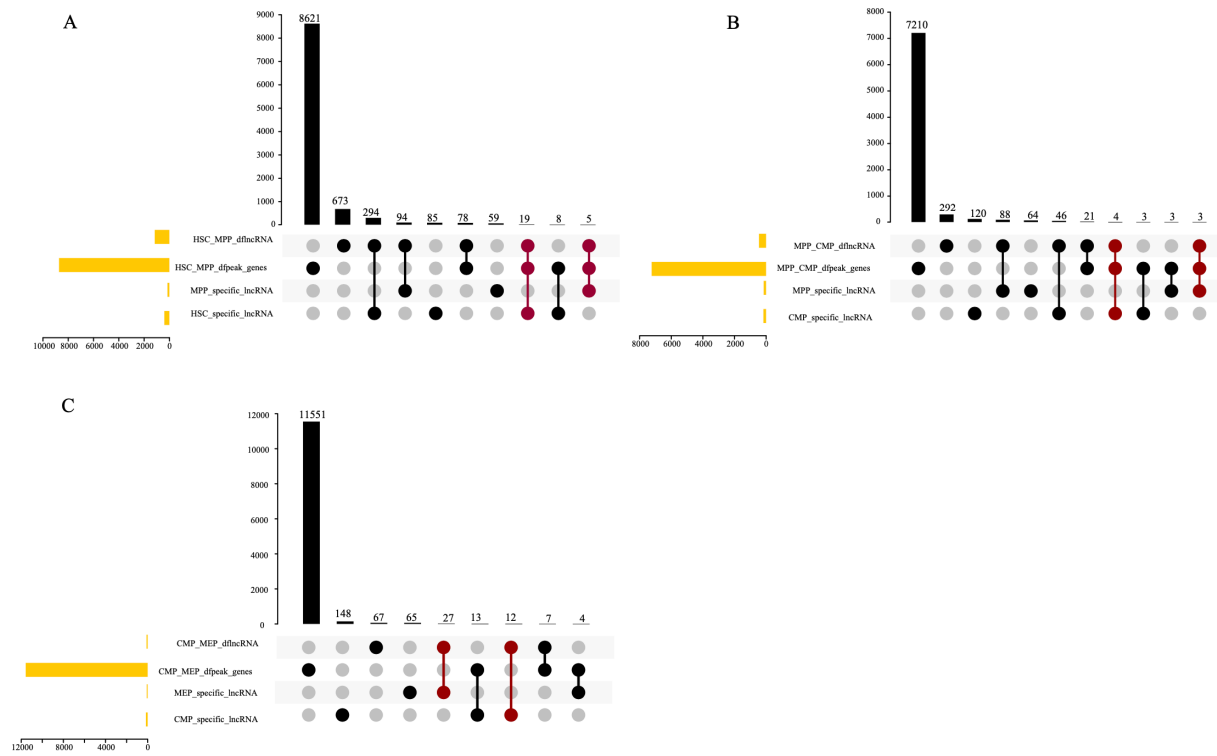

**Supplemental Figure 5. The expression of lncRNAs with potential regulatory functions at HSC (A, B, C, D, E), MPP (F, G) and CMP (H, I) stages.**

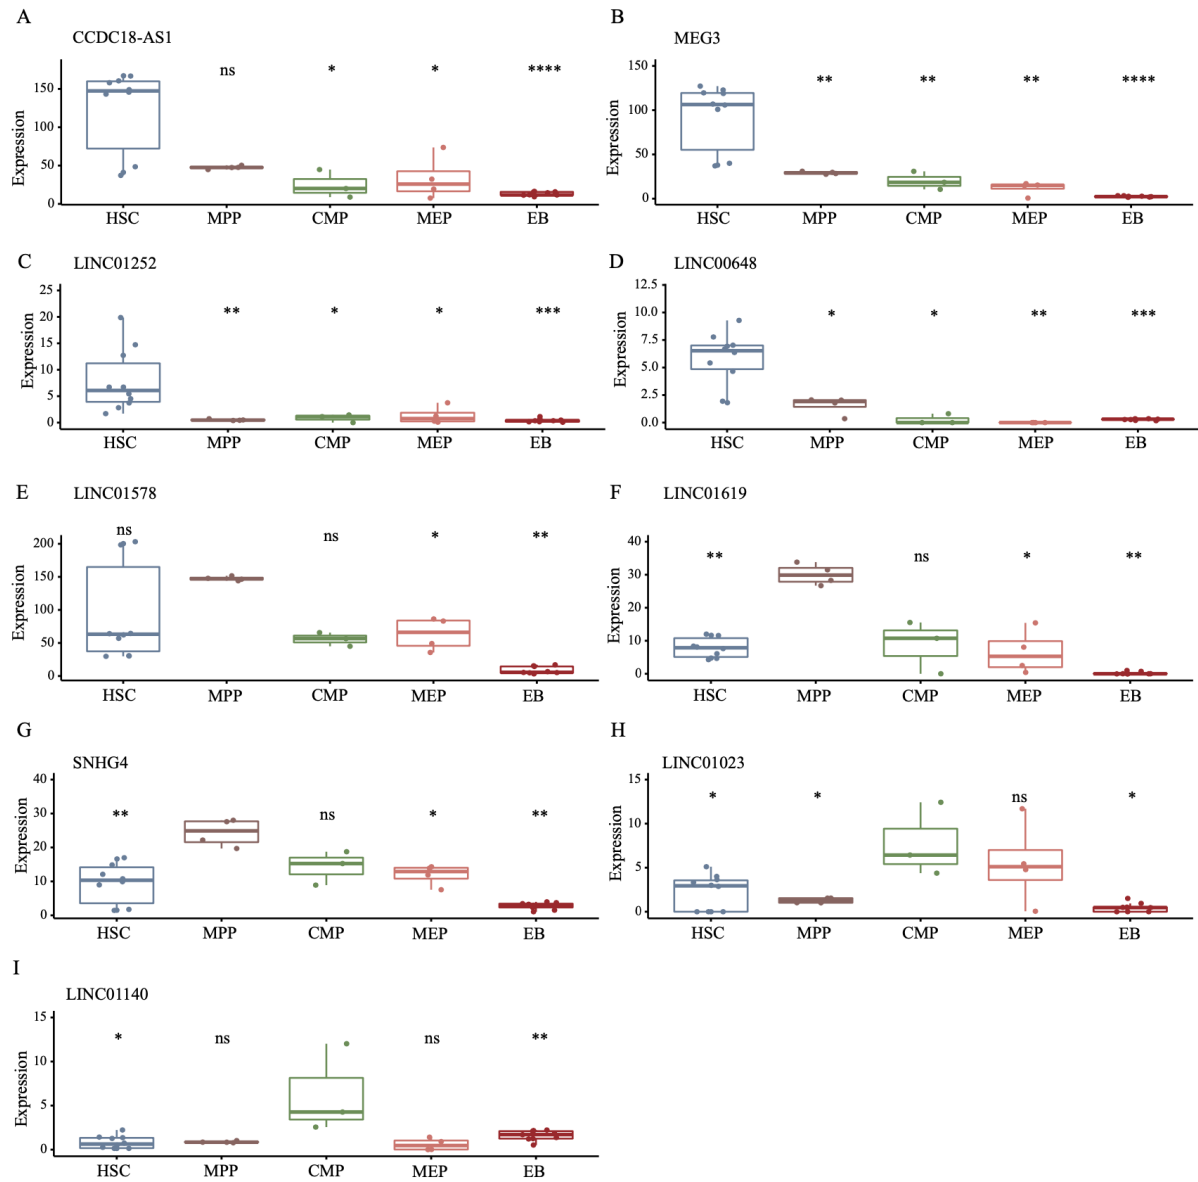

**Supplemental Figure 6. Overexpression of DANCER promotes erythroid differentiation by compromising megakaryocyte differentiation.**

(A) The detection of DANCER overexpression in differentiated CD34<sup>+</sup> cells (Day 11) by qPCR assay. (B) The expression of CD235a were detected by flow cytometry in the differentiated DANCER-OE CD34<sup>+</sup> cells (Day 13). (C) Colony-forming capacity analysis of DANCER overexpression in CD34<sup>+</sup> cells. The percentage of erythroid progenitor colonies (BFU-E/CFU-E, red) in DANCER-OE CD34<sup>+</sup> cells was higher than that of the control, while the percentage of colonies (CFU-GEMM, blue) containing megakaryocyte progenitors in DANCER-OE CD34<sup>+</sup> cells was lower than that of the control. (D) Overexpression of DANCER in CD34<sup>+</sup> cells promote the accumulation of  $\beta$ -hemoglobin (HBB) and  $\gamma$ -hemoglobin (HBG) proteins on Day 13. (E) Function enrichment of differently expressed genes caused by DANCER overexpression in K562 cells. The X axis is the negative logarithm of P value, the Y axis is the function items. Statistical results were analyzed by student's t-test and Kruskal-Wallis test, \**p* < 0.05, \*\**p* < 0.01, \*\*\**p* < 0.001.

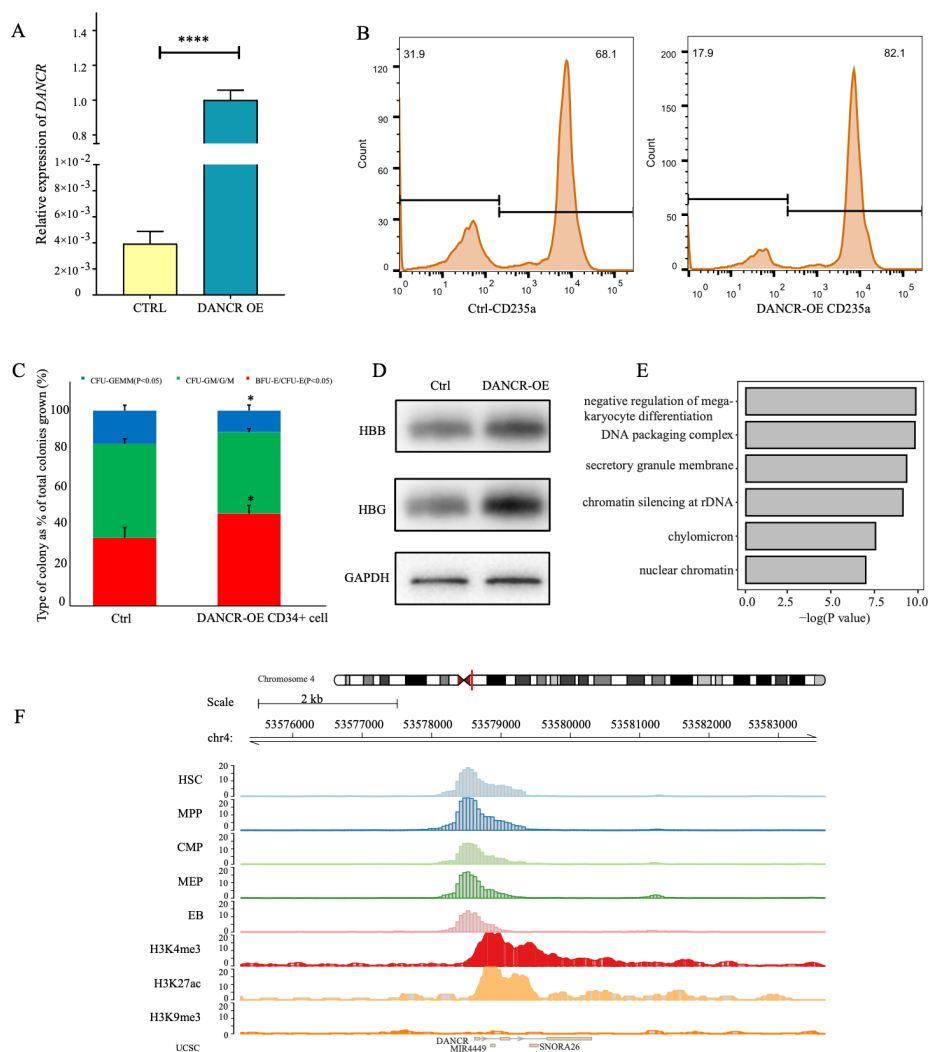

**Supplemental Figure 7. Overexpression of PCED1B-AS1 promotes erythroid differentiation.** (A) The detection of PCED1B-AS1 overexpression in differentiated CD34+ cells (Day 11) by qPCR assay. (B) The detection of CD235a+ cells by flow cytometry in the PCED1B-AS1-OE differentiated CD34+ cells (Day 13). The percentage on right in each figure represents the proportion of CD235a+ cells. (C) Relative expression of erythroid related genes in differentiated PCED1B-AS1-OE CD34+ cells (Day 11) detected by qPCR assay. (D) The expression of  $\beta$ -hemoglobin (HBB) and  $\gamma$ -hemoglobin (HBG) proteins detected by western blot in differentiated PCED1B-AS1-OE CD34+ cells (Day 13). Statistical results were analyzed by student's t-test and Kruskal-Wallis test, \* $p < 0.05$ , \*\* $p < 0.01$ , \*\*\* $p < 0.001$ . Ctrl: control group, OE: overexpression.

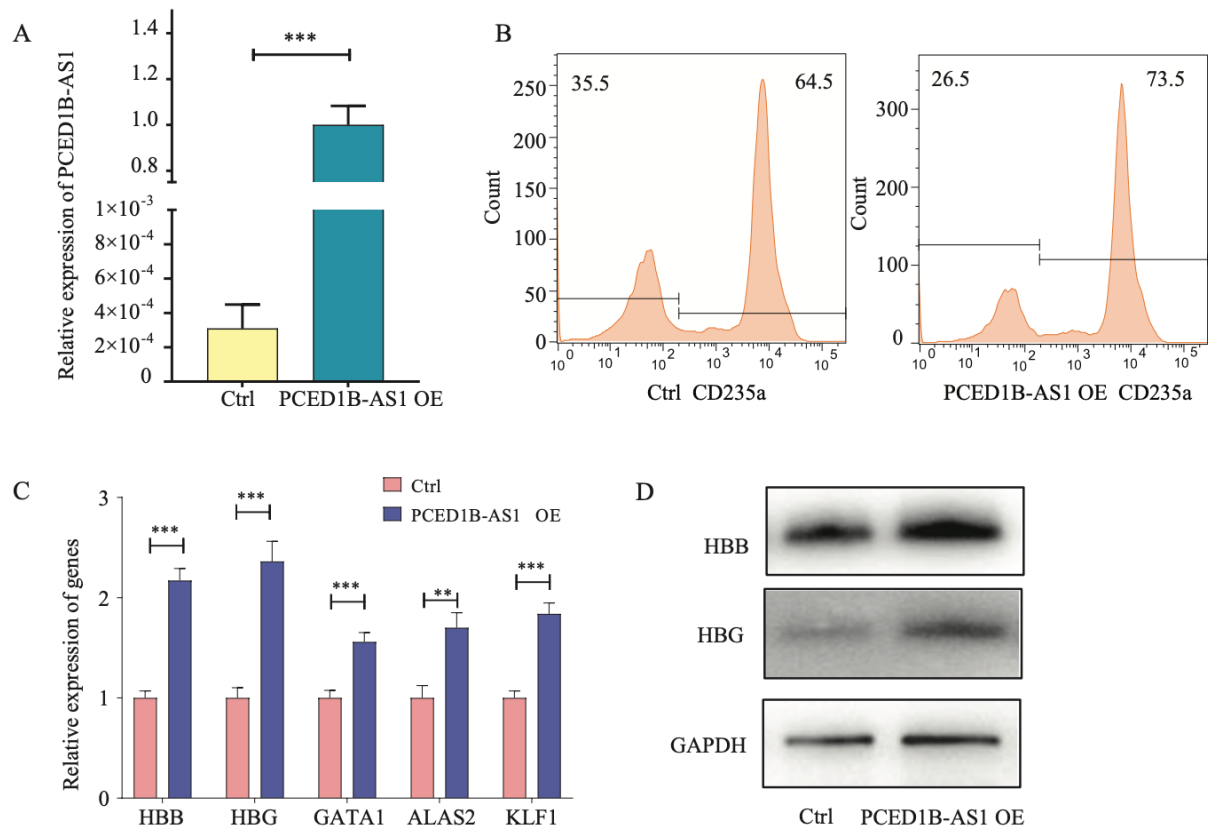



## Supplemental Table 1 Primer Sequences

### A: Primer sequences used for knockdown

| Gene target       | shRNA ID               | mRNA target site           | 97mer oligo                                                                |
|-------------------|------------------------|----------------------------|----------------------------------------------------------------------------|
| <i>DANCR</i>      | <i>DANCR</i> -sh1      | GCTGGTAAAGAAATGG<br>ATTAG  | GATCCGCTGGTAAAGAAATGGATTAGC<br>TTCCTGTCAGACTAATCCATTTCTTTAC<br>CAGCTTTTTG  |
| <i>DANCR</i>      | <i>DANCR</i> -sh2      | GATATGTCATCACCGGA<br>AACT  | GATCCGATATGTCATCACCGGAAACTCT<br>TCCTGTCAGAAGTTTCCGGTGATGACA<br>TATCTTTTTG  |
| <i>PCED1B-ASI</i> | <i>PCED1B-ASI</i> -sh1 | GCCAGTGTCAAGTCTTTG<br>TTCC | GATCCGCCAGTGTCAAGTCTTTGTTCCC<br>TTCCTGTCAGAGGAACAAAGACTGAC<br>ACTGGCTTTTTG |
| <i>PCED1B-ASI</i> | <i>PCED1B-ASI</i> -sh2 | GGAGAATCAGACATTA<br>CTTTC  | GATCCGGAGAATCAGACATTACTTTCC<br>TTCCTGTCAGAGAAAGTAATGTCTGAT<br>TCTCCTTTTTG  |

### B: Primer sequences used for overexpression

| Primer name               | Primer sequences (5'-3')       |
|---------------------------|--------------------------------|
| <i>DANCR</i> -F-NotI      | GGGGCGGCCGCCCGCCCGCGCCGCCTCTC  |
| <i>DANCR</i> -R-XbaI      | GGGTCTAGAGTCAGGCCAAGTAAGTTTATT |
| <i>PCED1B-ASI</i> -F-NotI | GGGGCGGCCGCAGGAAGCGGAAGACTAATG |
| <i>PCED1B-ASI</i> -R-XbaI | GGGTCTAGAAGGAGACCAGGGTTTTAT    |

### C: Primer sequences used for dual-luciferase reporter assay

| Primer name                              | Primer sequences (5'-3')                                                         |
|------------------------------------------|----------------------------------------------------------------------------------|
| <i>PCED1B-ASI</i> -Promoter-F-KpnI       | CCCGGTACCTCTTTCTGTCTCTCTCTCTCTCT                                                 |
| <i>PCED1B-ASI</i> -Promoter-R-SacI       | CCCAGCTCTAAAGCAAGAACTAAATGCTGAC                                                  |
| <i>PCED1B-ASI</i> -Promoter-Del-421      | TGTCCATTTTAATAAATTTACAAGTTTATCAATTTGTTATTGC<br>CAAGCACCAGTTGTC                   |
| <i>PCED1B-ASI</i> -Promoter-Del-421-anti | GACAACTGGTGCTTGGCAATAACAAATTGATAAACTTGTA<br>ATTTATTAATGGACA                      |
| <i>PCED1B-ASI</i> -Promoter-Mut-423      | CTAAAGAGACAACCTGGTGCTTGGCAATAACAAATTTTTTT<br>TGATTGATAAACTTGAAATTTATTAATGGACAGT  |
| <i>PCED1B-ASI</i> -Promoter-Mut-423-anti | ACTGTCCATTTTAATAAATTTACAAGTTTATCAATCAAAAA<br>AATTTGTTATTGCCAAGCACCAGTTGTCTCTTTAG |

### D: Primer sequences used for RNA pull-down

| Primer name                    | Primer sequences (5'-3')                    |
|--------------------------------|---------------------------------------------|
| <i>PCED1B-ASI</i> -sense-F     | TAATACGACTCACTATAGGGAGGAAGCGGAAGACTAATGACCG |
| <i>PCED1B-ASI</i> -sense-R     | AGGAGACCAGGGTTTTATTATTA                     |
| <i>PCED1B-ASI</i> -antisense-F | AGGAAGCGGAAGACTAATGACCG                     |
| <i>PCED1B-ASI</i> -antisense-R | TAATACGACTCACTATAGGGAGGAAGCGGAAGACTAATGACCG |

**Supplemental Table 2: Motif enrichment results of specific peaks at each stage during erythroid differentiation.**

| TFs     | Expression |          |        |          |       | TF_motif                                                            | Enrichment score |         |          |         |         |
|---------|------------|----------|--------|----------|-------|---------------------------------------------------------------------|------------------|---------|----------|---------|---------|
|         | EB         | MEP      | CMP    | MPP      | HSC   |                                                                     | EB               | MEP     | CMP      | MPP     | HSC     |
| ATF1    | 38.79      | 0.000706 | 4.714  | 0.144    | 4.041 | Atf1(bZIP)/K562-ATF1-ChIP-Seq(GSE31477)/Homer-GATGACGTCA            | 20.1211          | 10.89   | 6.55     | 19.3675 | 8.888   |
| ATF2    | 95.03      | 31.08    | 45.9   | 27.15    | 66.78 | Atf2(bZIP)/3T3L1-Atf2-ChIP-Seq(GSE56872)/Homer-NRRTGACGTCAT         | 14.5667          | 26.765  | 14.49    | 16.1825 | 24.368  |
| ATF3    | 131.7      | 1815     | 2183   | 3034     | 3111  | Atf3(bZIP)/GBM-ATF3-ChIP-Seq(GSE33912)/Homer-DATGASTCATHN           | 7                | 8.6475  | 11.8467  | 3.93    | 6.691   |
| ATF4    | 7.565      | 36.02    | 153.7  | 99.95    | 62.42 | Atf4(bZIP)/MEF-Atf4-ChIP-Seq(GSE35681)/Homer-MTGATGCAAT             | 311.21           | 264.923 | 207.543  | 177.4   | 154.085 |
| ATF7    | 50.19      | 0.04989  | 1.053  | 0.000166 | 1.478 | Atf7(bZIP)/3T3L1-Atf7-ChIP-Seq(GSE56872)/Homer-NRGTGACGTCA          | 23.1022          | 24.51   | 18.56    | 23.6475 | 29.818  |
| BACH1   | 298.6      | 1396     | 1594   | 1989     | 2042  | Bach1(bZIP)/K562-Bach1-ChIP-Seq(GSE31477)/Homer-AWWNTGCTGAGTCAT     | 19.06            | 14.5925 | 25.79    | 15.705  | 16.738  |
| BATF    | 143.1      | 1791     | 2087   | 3018     | 3001  | BATF(bZIP)/Th17-BATF-ChIP-Seq(GSE39756)/Homer-DATGASTCAT            | 1.22556          | 11.6125 | 4.76333  | 0.1775  | 4.928   |
| BCL6    | 0.001195   | 0.9147   | 0.3067 | 18.2     | 30.25 | Bcl6(bZIP)/Liver-Bcl6-ChIP-Seq(GSE31578)/Homer-NNNCTTCCAGGAAA       | 0.747778         | 3.395   | 9.45667  | 8.4325  | 5.154   |
| BHLHE40 | 19.97      | 0.001522 | 10.25  | 4.836    | 24.98 | bHLHE40(bHLH)/HepG2-BHLHE40-ChIP-Seq(GSE31477)/Homer-KCAGTGMCMN     | 3.21778          | 7.09    | 10.94    | 13.08   | 2.051   |
| CLOCK   | 39.13      | 10.06    | 48.4   | 85.51    | 121.8 | CLOCK(bHLH)/Liver-Clock-ChIP-Seq(GSE39860)/Homer-GHCACGTG           | 1.5              | 1.315   | 5.19     | 3.585   | 4.905   |
| CTCF    | 833.7      | 19320    | 13500  | 15930    | 13320 | CTCF(Zf)/CD4+CTCF-ChIP-Seq(Barski_et_al)/Homer-AYAGTGCCMYCTRTGGCCA  | 11.8122          | 10.7525 | 5.42333  | 7.0525  | 4.798   |
| E2F3    | 26.09      | 18       | 11.21  | 11.12    | 10.43 | E2F3(E2F)/MEF-E2F3-ChIP-Seq(GSE1376)/Homer-BTKGGCGGAAA              | 6.17556          | 10.1525 | 7.81     | 4.5975  | 4.924   |
| E2F4    | 71.67      | 31.57    | 30.28  | 14.6     | 40.03 | E2F4(E2F)/K562-E2F4-ChIP-Seq(GSE31477)/Homer-GGCGGGAHAH             | 89.2576          | 12.7125 | 19.03    | 10.885  | 8.571   |
| EGR1    | 6.566      | 27.36    | 22.96  | 45.23    | 50.68 | Egr1(Zf)/K562-Egr1-ChIP-Seq(GSE3465)/Homer-TGCGTGGY                 | 7.52778          | 3.925   | 6.19     | 2.155   | 2.586   |
| ELF1    | 542.7      | 1748     | 2503   | 2701     | 2326  | ELF1(ETS)/Jurkat-ELF1-ChIP-Seq(SRA014231)/Homer-AVCCGGAAGT          | 46.0789          | 259.183 | 273.437  | 300.023 | 303.693 |
| ELK4    | 578.5      | 1349     | 1766   | 1865     | 2034  | Elk4(ETS)/Hela-Elk4-ChIP-Seq(GSE31477)/Homer-NRYTCCGGY              | 5.04333          | 2.7825  | 3.28333  | 6.6275  | 5.921   |
| ERG     | 190.5      | 4425     | 8251   | 10150    | 9051  | ERG(ETS)/VCaP-ERG-ChIP-Seq(GSE14097)/Homer-ACAGGAAGTG               | 0.522222         | 37.605  | 56.6367  | 85.7    | 82.572  |
| ETS1    | 221.6      | 4331     | 8000   | 9004     | 8043  | ETS1(ETS)/Jurkat-ETS1-ChIP-Seq(GSE17954)/Homer-ACAGGAAGTG           | 0.571111         | 0.28    | 5.48     | 3.67    | 4.22    |
| FOSL2   | 161.8      | 1843     | 2137   | 3107     | 2946  | Fosl2(bZIP)/3T3L1-Fosl2-ChIP-Seq(GSE56872)/Homer-NATGASTCABNN       | 0.263333         | 4.765   | 5.43333  | 7.7475  | 7.154   |
| FOXP2   | 21.4       | 65.9     | 33.19  | 61.74    | 20.21 | FOXP2(Forkhead)/U2OS-FOXP2-ChIP-Seq(E-MTAB-2204)/Homer-SCHTGTTCACAT | 2.66667          | 9.83    | 4.2      | 4.4625  | 3.37    |
| FOXO1   | 69.87      | 354.3    | 493.3  | 644.3    | 605.3 | Foxo1(Forkhead)/RAW-Foxo1-ChIP-Seq(Fan_et_al)/Homer-CTGTTTAC        | 1.23667          | 8.3625  | 4.93     | 4.5375  | 26.041  |
| FOXO3   | 43.37      | 87.13    | 31.67  | 54.95    | 10.72 | Foxo3(Forkhead)/U2OS-Foxo3-ChIP-Seq(E-MTAB-2701)/Homer-DGTAAACA     | 25.4811          | 14.8175 | 10.24    | 14.3275 | 17.493  |
| FOXP1   | 35.03      | 73.46    | 11.35  | 54.48    | 8.823 | FOXP1(Forkhead)/H9-FOXP1-ChIP-Seq(GSE31006)/Homer-NYTTTACHN         | 30.5578          | 85.5075 | 79.88    | 82.7825 | 77.698  |
| GABPA   | 413.6      | 3405     | 6230   | 7025     | 6119  | GABPA(ETS)/Jurkat-GABPA-ChIP-Seq(GSE17954)/Homer-RACCGGAAGT         | 4.79444          | 6.0775  | 8.17667  | 14.2325 | 14.749  |
| GATA1   | 3044       | 8712     | 3805   | 1364     | 975.9 | Gata1(Zf)/K562-GATA1-ChIP-Seq(GSE18829)/Homer-SAGATAAGRV            | 314.4            | 260.638 | 63.9467  | 8.4925  | 3.985   |
| GATA2   | 3032       | 8923     | 3867   | 1384     | 901.4 | Gata2(Zf)/K562-GATA2-ChIP-Seq(GSE18829)/Homer-BBCTTACTS             | 0.576667         | 35.645  | 46.01    | 2.715   | 4.739   |
| GATA3   | 2826       | 8191     | 3222   | 941.4    | 615.1 | GATA3(Zf)/Treg-Gata3-ChIP-Seq(GSE20898)/Homer-AGATAASR              | 0.054444         | 0.74    | 0.716667 | 6.105   | 2.896   |
| HOX9A   | 1.20E-05   | 47.98    | 157.5  | 450.3    | 534.6 | Hox9a(Hox)/HSC-Hox9a-ChIP-Seq(GSE33509)/Homer-GGCCATAAATCA          | 0.743333         | 31.5075 | 24.99    | 23.6025 | 29.943  |
| IRF1    | 66.93      | 439.7    | 438.1  | 889.2    | 868   | IRF1(IRF)/PBMC-IRF1-ChIP-Seq(GSE43036)/Homer-GAAAGTGAAGT            | 16.22            | 54.2775 | 55.9733  | 28.1125 | 42.147  |
| IRF2    | 76.33      | 548.1    | 598.5  | 1140     | 1148  | IRF2(IRF)/Erythroblasts-IRF2-ChIP-Seq(GSE36985)/Homer-GAAAYGAAASY   | 46.7078          | 4.6325  | 21.7033  | 5.5825  | 12.793  |
| IRF3    | 43.01      | 406.3    | 543.3  | 908.4    | 916.7 | IRF3(IRF)/BMDM-IRF3-ChIP-Seq(GSE67343)/Homer-AGTTCAKTTTC            | 4.75889          | 12.835  | 12.04    | 4.3675  | 6.186   |
| IRF8    | 108.9      | 611.9    | 746.7  | 1332     | 1198  | IRF8(IRF)/BMDM-IRF8-ChIP-Seq(GSE77884)/Homer-GRAASTGAAAST           | 0.044444         | 0.425   | 7.30667  | 0.9175  | 3.271   |
| JUNB    | 145.8      | 1841     | 2191   | 3159     | 3144  | JunB(bZIP)/DendriticCells-JunB-ChIP-Seq(GSE36099)/Homer-RATGASTCAT  | 0.157778         | 4.0875  | 7        | 0.735   | 0.739   |
| JUND    | 111.2      | 110.7    | 111.4  | 93.45    | 128.6 | JunD(bZIP)/K562-JunD-ChIP-Seq(Homer-ATGACGTATCN                     | 2.46444          | 32.86   | 41.9     | 20.4975 | 8.562   |
| KLF1    | 0.01698    | 0.01987  | 1.934  | 194.5    | 398.5 | EKLf1(Zf)/Erythrocyte-Klf1-ChIP-Seq(GSE20478)/Homer-NWGGGTGTGGY     | 0.137            | 0.02    | 1.46     | 2.655   | 11.6    |
| KLF3    | 1015       | 365.4    | 84.96  | 32.31    | 88.29 | KLF3(Zf)/MEF-Klf3-ChIP-Seq(GSE44748)/Homer-NRGCCCRCCCHBN            | 16.7367          | 18.9325 | 16.03    | 32.795  | 32.351  |
| KLF6    | 955        | 479.4    | 107.1  | 56.24    | 129.9 | KLF6(Zf)/PDAC-KLF6-ChIP-Seq(GSE64557)/Homer-MKGGYGTGGCC             | 14.4256          | 87.72   | 186.987  | 18.29   | 69.397  |
| MAFF    | 4.186      | 18.24    | 32.11  | 42.04    | 56.67 | MafF(bZIP)/HepG2-MafF-ChIP-Seq(GSE31477)/Homer-HWWGTGAGCAWWTTT      | 0.744444         | 13.8    | 10.96    | 11.1725 | 10.232  |
| MAX     | 27.52      | 76.46    | 99.98  | 88.6     | 137.6 | Max(bHLH)/K562-Max-ChIP-Seq(GSE31477)/Homer-RCCAGTGGYNN             | 59.8767          | 104.433 | 79.33    | 166.47  | 123.601 |
| MAZ     | 203.2      | 188.8    | 159.9  | 156.5    | 181   | Maz(Zf)/HepG2-Maz-ChIP-Seq(GSE31477)/Homer-GGGGGGGG                 | 16.83            | 40.295  | 29.27    | 4.0825  | 3.499   |
| MEIS1   | 64.6       | 161.5    | 127.8  | 120.1    | 96    | Meis1(Homeobox)/MastCells-Meis1-ChIP-Seq(GSE48085)/Homer-VGCTGWCAVB | 33.2811          | 118.088 | 177.743  | 110.96  | 175.447 |
| MITF    | 117.4      | 263.6    | 426.5  | 506.4    | 426.2 | MITF(bHLH)/MastCells-MITF-ChIP-Seq(GSE48085)/Homer-RTCATGTGAC       | 9.81667          | 4.6325  | 1.94     | 1.7975  | 3.958   |
| MYB     | 177.6      | 812      | 647.2  | 438.7    | 434.2 | MYB(HTH)/ERMVb-Myb-ChIPSeq(GSE22095)/Homer-GGCVGTR                  | 14.3344          | 53.705  | 61.6267  | 50.3425 | 37.316  |
| NF1     | 116        | 413.6    | 288.9  | 477.4    | 485.6 | NF1(CTF)/LNCAP-NF1-ChIP-Seq(Unpublished)/Homer-CYTGGCABNSTGCCAR     | 3.32             | 5.275   | 9.33667  | 21.52   | 17.839  |
| NRF1    | 118.1      | 4.111    | 5.842  | 6.873    | 15.32 | NRF1(NRF)/MCF7-NRF1-ChIP-Seq(Unpublished)/Homer-CTGCGCATGCGC        | 7.73333          | 5.81    | 1.53     | 2.3125  | 5.167   |
| RFX2    | 134.5      | 354.8    | 360.8  | 409.8    | 467.6 | Rfx2(HTH)/LoVo-RFX2-ChIP-Seq(GSE49402)/Homer-GTTGCCATGGCAACM        | 4.29889          | 12.12   | 10.8233  | 2.755   | 3.784   |
| RFX5    | 87.43      | 222      | 220.2  | 241.3    | 302.7 | Rfx5(HTH)/GM12878-Rfx5-ChIP-Seq(GSE31477)/Homer-SCCTAGCAACAG        | 20.92            | 27.6025 | 24.8967  | 12.115  | 18.325  |
| RUNX1   | 27.84      | 4490     | 5929   | 5136     | 4254  | RUNX1(Runt)/Jurkat-RUNX1-ChIP-Seq(GSE29180)/Homer-AAACCACARM        | 2.76222          | 24.7675 | 28.1933  | 41.325  | 42.406  |
| RUNX2   | 25.18      | 4358     | 5207   | 4518     | 3670  | RUNX2(Runt)/Pca-RUNX2-ChIP-Seq(GSE33889)/Homer-NWAACCACADNN         | 0.33             | 4.48    | 10.11    | 17.2075 | 14.75   |
| SMAD2   | 7.397      | 105      | 71.16  | 69.02    | 59.72 | Smad2(MAD)/ES-SMAD2-ChIP-Seq(GSE29422)/Homer-CTGTCTGG               | 34.4256          | 25.1875 | 39.5567  | 18.965  | 24.869  |
| SMAD3   | 61.67      | 167.5    | 90.78  | 60.05    | 102.9 | Smad3(MAD)/NPC-Smad3-ChIP-Seq(GSE36673)/Homer-TWGTCTGG              | 0.522222         | 9.685   | 3.51667  | 4.68    | 7.69    |
| SMAD4   | 7.156      | 78.62    | 54.59  | 46.63    | 38.81 | Smad4(MAD)/ESC-SMAD4-ChIP-Seq(GSE29422)/Homer-VBSYGTCTGG            | 5.49667          | 3.6525  | 6.58667  | 15.565  | 15.624  |
| SOX6    | 0          | 42.12    | 35.3   | 26.6     | 13.28 | Sox6(HMG)/Myotubes-Sox6-ChIP-Seq(GSE32627)/Homer-CCATTGTTNY         | 7.33             | 0.06    | 0.02     | 0       | 0.914   |
| STAT1   | 23.36      | 19.86    | 10.06  | 42.68    | 49.59 | STAT1(Stat)/HelaS3-STAT1-ChIP-Seq(GSE12782)/Homer-NATTTCCNGGAAAT    | 4.88889          | 11.6425 | 8.52     | 7.32    | 13.385  |
| STAT3   | 47.91      | 24.02    | 19.01  | 45.8     | 79    | Stat3(Stat)/mES-Stat3-ChIP-Seq(GSE11431)/Homer-CTCCGGGAA            | 20.2678          | 70.01   | 94.1267  | 19.525  | 49.657  |
| STAT4   | 46.45      | 86.95    | 59.8   | 74.19    | 124.7 | STAT4(Stat)/CD4-Stat4-ChIP-Seq(GSE22104)/Homer-NYTTCCWGGAAAR        | 0.535556         | 3.04    | 6.63333  | 3.4875  | 10.381  |
| STAT6   | 0.3882     | 6.2      | 10.71  | 39.18    | 68.07 | STAT6(Stat)/CD4-Stat6-ChIP-Seq(GSE22104)/Homer-ABTTCYRRGAA          | 8.55             | 22.88   | 26.07    | 5.95    | 13.152  |
| TCF12   | 35.18      | 337.3    | 334.8  | 479.2    | 320.7 | Tcf12(bHLH)/GM12878-Tcf12-ChIP-Seq(GSE32465)/Homer-VACGCTGYTG       | 7.05444          | 64.8475 | 43.1767  | 16.5425 | 34.177  |
| TFE3    | 111.7      | 29.28    | 66.68  | 94.99    | 119.7 | TFE3(bHLH)/MEF-TFE3-ChIP-Seq(GSE75757)/Homer-GTCACGTGACYV           | 1.63222          | 3.6775  | 6.15333  | 4.6275  | 2.704   |
| TGIF1   | 56.92      | 295.4    | 318.8  | 333.5    | 254.7 | Tgif1(Homeobox)/mES-Tgif1-ChIP-Seq(GSE5404)/Homer-YTGWCADY          | 47.1911          | 15.995  | 6.26     | 23.0375 | 23.894  |
| TGIF2   | 80.01      | 622.5    | 595.7  | 768.2    | 540.5 | Tgif2(Homeobox)/mES-Tgif2-ChIP-Seq(GSE5404)/Homer-TGTCANVT          | 3.78444          | 21.6875 | 18.3867  | 24.93   | 20.902  |
| USF1    | 42.32      | 37.41    | 105    | 133.9    | 202.1 | USF1(bHLH)/GM12878-Usf1-ChIP-Seq(GSE32465)/Homer-SGTCACTGGR         | 35.5989          | 36.96   | 21.6467  | 16.2625 | 10.359  |
| USF2    | 40.7       | 18.71    | 80.15  | 88.57    | 121.7 | Usf2(bHLH)/C2C12-Usf2-ChIP-Seq(GSE36030)/Homer-GTCACGTGTT           | 0.243333         | 2.5     | 6.26     | 0.66    | 0.484   |
| ZBTB33  | 23.59      | 0.3781   | 14.89  | 5.273    | 8.827 | ZBTB33(Zf)/GM12878-ZBTB33-ChIP-Seq(GSE32465)/Homer-GVYTCTCGGAGAAC   | 4.88444          | 6.4475  | 7.77     | 6.2575  | 8.823   |
| ZFX     | 57.96      | 36.13    | 27.29  | 37.25    | 35.99 | ZFX(Zf)/mES-Zfx-ChIP-Seq(GSE11431)/Homer-AGGCGCTRG                  | 7.39222          | 6.4075  | 9.22333  | 11.1525 | 15.673  |

**Supplemental Table 3: Motif enrichment results of differential peaks during erythroid differentiation.**

| TFs     | Differential Gene Expression |         |         |         |           |                 | TF_motif                                                 | Enrichment_score |              |              |              |
|---------|------------------------------|---------|---------|---------|-----------|-----------------|----------------------------------------------------------|------------------|--------------|--------------|--------------|
|         | MEP_EB                       | CMP_MEP | MPP_CMP | HSC_MPP | MEP_EB_up |                 |                                                          | MEP_EB_log2      | CMP_MEP_log2 | MPP_CMP_log2 | HSC_MPP_log2 |
| ATF3    | 1632                         | 1113    | 328     | 1131    | 19.75     | Atf3(bZIP)      | GBM-ATF3-ChIP-Seq(GSE33912)/Homer-DATGASTCATHN           | 0.40406233       | -1.154018551 | 1.830124542  | -0.602455048 |
| BACH1   | 1246                         | 701.9   | 224.4   | 656     | 61.12     | Bach1(bZIP)     | K562-Bach1-ChIP-Seq(GSE31477)/Homer-AWWNTGCTGAGTCAT      | 1.214044256      | -0.02220727  | -1.398016948 | 0.968486622  |
| BATF    | 1645                         | 1113    | 308.8   | 1117    | 20.14     | BATF(bZIP)      | Th17-BATF-ChIP-Seq(GSE39756)/Homer-DATGASTCAT            | -3.510111596     | 0.321597151  | 5.948022757  | -4.932371478 |
| BHLHE40 | 0.003359                     | 11.89   | 0.1191  | 26.12   | 0.5315    | bHLHE40(bHLH)   | HepG2-BHLHE40-ChIP-Seq(GSE31477)/Homer-KCACGTGMCN        | -0.417833685     | -0.966038745 | -0.991980092 | 2.907077368  |
| CEBPB   | 88.06                        | 132.2   | 76.95   | 21.14   | 2.076     | CEBP-AP1(bZIP)  | ThioMac-CEBPb-ChIP-Seq(GSE21512)/Homer-DRTGTTGCAA        | 2.673155224      | -2.415889548 | -0.412883341 | 1.757603462  |
| DMC1    | 126.5                        | 27.91   | 9.372   | 5.833   | 11.28     | PRDM9(Zf)       | Testis-DMC1-ChIP-Seq(GSE35498)/Homer-ADGGYAGYAGCATCT     | 2.678905626      | -1.92930882  | 7.603877037  | -5.862619311 |
| EGR1    | 25.36                        | 21.87   | 5.444   | 18.59   | 3.043     | Egr1(Zf)        | K562-Egr1-ChIP-Seq(GSE32465)/Homer-TGCGTGGG              | 4.17146296       | -0.497319956 | 1.001243852  | -0.164483344 |
| ELF3    | 3534                         | 3200    | 931.5   | 1300    | 0.02344   | ELF3(ETS)       | PDAC-ELF3-ChIP-Seq(GSE64557)/Homer-ANCAGGAAGT            | 12.25658002      | -24.12229561 | 1.277571161  | -1.320021294 |
| ELK1    | 1220                         | 941.4   | 314.6   | 580.2   | 0.005206  | Elk1(ETS)       | Hela-Elk1-ChIP-Seq(GSE31477)/Homer-HACTTCCGGY            | 0.285662813      | 0.290102514  | 8.255092584  | -7.133552614 |
| ELK4    | 1169                         | 856.3   | 290.6   | 605.2   | 0.01124   | Elk4(ETS)       | Hela-Elk4-ChIP-Seq(GSE31477)/Homer-NRYTTCGGY             | 1.873447067      | -0.278698808 | -0.394945893 | -0.144811729 |
| FOXP1   | 50.81                        | 24.56   | 7.875   | 3.619   | 20.97     | FOXP1(Forkhead) | HEK293-FOXP1-ChIP-Seq(GSE15673)/Homer-NVWVGTITAC         | -2.060786804     | -0.342525173 | 1.540099562  | 0.53281205   |
| FOXP2   | 40.63                        | 29.41   | 3.316   | 4.339   | 12.89     | FOXP2(Forkhead) | U2OS-FOXP2-ChIP-Seq(E-MTAB-2204)/Homer-SCHTGTITACAT      | -1.429395934     | 0.870291915  | 0.011085584  | 1.249537677  |
| FOXP3   | 86.79                        | 33.01   | 13.11   | 5.285   | 20.14     | Foxo3(Forkhead) | U2OS-Foxo3-ChIP-Seq(E-MTAB-2701)/Homer-DGTAACA           | 1.011747628      | 0.155354127  | -0.07150852  | -0.071754217 |
| GATA1   | 7612                         | 3060    | 3686    | 194.1   | 669.2     | Gata1(Zf)       | K562-GATA1-ChIP-Seq(GSE18829)/Homer-SAGATAAGRV           | 0.796145609      | 1.797369203  | 2.881538653  | 1.447295816  |
| GATA2   | 7897                         | 3124    | 3724    | 199.5   | 686.2     | Gata2(Zf)       | K562-GATA2-ChIP-Seq(GSE18829)/Homer-AGTATATCT            | -5.181096582     | 0.077050094  | 3.95767625   | -0.830261304 |
| GATA3   | 7715                         | 2908    | 3676    | 117.9   | 834.5     | GATA3(Zf)       | Treg-Gata3-ChIP-Seq(GSE20898)/Homer-AGATAAASR            | -0.11543167      | -0.743569553 | -2.801225525 | 1.59003941   |
| HOXA2   | 18.48                        | 21.24   | 0.5467  | 32.58   | 0.1567    | HOXA2(Homeobox) | mES-Hoxa2-ChIP-Seq(Donaldson_et_al)/Homer-GYCATCMATCAT   | -6.593113145     | 8.606594931  | -9.639042736 | -0.558733244 |
| HOXB4   | 68.26                        | 70.37   | 13.64   | 78.99   | 3.494     | Hoxb4(Homeobox) | ES-Hoxb4-ChIP-Seq(GSE34014)/Homer-GATTRATGGCY            | 0.544907056      | 1.777546017  | -0.846120619 | -0.90770406  |
| IRF2    | 417.4                        | 169.9   | 31.45   | 264.4   | 0.2881    | IRF2(IRF)       | Erythroblasts-IRF2-ChIP-Seq(GSE36985)/Homer-GAAASYGAAASY | 4.309921734      | -1.712115795 | 1.084665313  | -1.090012984 |
| IRF3    | 403.9                        | 181.5   | 29.5    | 236.7   | 0.9241    | IRF3(IRF)       | BMDM-Irf3-ChIP-Seq(GSE67343)/Homer-AGTTTCAKTTTC          | -2.122642978     | -0.1420439   | 2.01968259   | -0.326823598 |
| IRF8    | 540.4                        | 282.4   | 41.68   | 277.2   | 0.6695    | IRF8(IRF)       | BMDM-Irf8-ChIP-Seq(GSE78874)/Homer-GRAASTGAAAST          | 4.951639911      | -3.383410913 | 1.511018482  | -1.109489459 |
| JUNB    | 1675                         | 1097    | 341.9   | 1101    | 23.19     | JunB(bZIP)      | Dendritic-Cells-JunB-ChIP-Seq(GSE36099)/Homer-RATGASTCAT | -4.986800624     | -0.508178629 | 2.68759904   | 0.350038838  |
| JUND    | 67.87                        | 53.18   | 34.72   | 48.62   | 17.45     | JunD(bZIP)      | K562-JunD-ChIP-Seq(Homer-ATGACGTATCATN                   | -2.593151599     | 0.104533466  | 0.320802421  | 1.36892091   |
| KLF1    | 204.8                        | 76.53   | 7.888   | 0.3107  | 182.5     | EKLf(Zf)        | Erythrocyte-Klf1-ChIP-Seq(GSE20478)/Homer-NWGGGTGTGGCY   | 3.039269689      | 1.146899922  | 5.274833963  | -2.295958137 |
| KLF4    | 170.6                        | 45.13   | 2.025   | 1.252   | 196.4     | Klf4(Zf)        | mES-Klf4-ChIP-Seq(GSE11431)/Homer-GCCACACCCA             | 7.036871801      | -4.72888546  | -1.006160883 | 2.831289127  |
| KLF5    | 258.4                        | 76.85   | 17.93   | 17.25   | 247.4     | KLF5(Zf)        | LoVo-KLF5-ChIP-Seq(GSE49402)/Homer-DGGYKGGG              | -0.874143412     | -2.934001806 | 20.6898691   | -7.24729325  |
| KLF6    | 362.6                        | 132.3   | 23.07   | 31.79   | 243       | KLF6(Zf)        | PDAC-KLF6-ChIP-Seq(GSE64557)/Homer-MKGGYGTGGCC           | -1.424064166     | -0.71235839  | 1.688512448  | -0.55343079  |
| KLF9    | 99.8                         | 30.05   | 4.519   | 24.27   | 86.33     | Klf9(Zf)        | GBM-Klf9-ChIP-Seq(GSE62211)/Homer-GCCACRCCAGY            | 2.232536777      | -0.925232556 | 0.54997491   | -0.511967289 |
| MAFK    | 397.7                        | 179.9   | 82.92   | 277.8   | 19.8      | MaFK(bZIP)      | C2C12-MaFK-ChIP-Seq(GSE36030)/Homer-GRAASTGACGA          | 3.245741631      | -4.401875621 | 4.701875457  | -3.261649491 |
| MAZ     | 120.3                        | 135.5   | 25.6    | 38.23   | 33.4      | Maz(Zf)         | HepG2-Maz-ChIP-Seq(GSE31477)/Homer-GGGGGGGG              | -0.575128031     | 0.877235109  | 2.404129919  | 0.206716986  |
| MEF2D   | 16.98                        | 43.67   | 3.657   | 26.67   | 0.2907    | MeF2d(MADS)     | Retina-MeF2d-ChIP-Seq(GSE61391)/Homer-GCTATTTTTAGC       | -4.498953451     | -0.588636443 | 0.229369549  | 1.533184237  |
| MITF    | 179.1                        | 180.5   | 103     | 228.2   | 5.467     | MITF(bHLH)      | MastCells-MITF-ChIP-Seq(GSE48085)/Homer-RTCATGTGAC       | 1.39426696       | 1.009016427  | 0.24900594   | -1.176726165 |
| NFATC1  | 63.46                        | 1.369   | 1.65    | 18.61   | 0.1929    | NFAT(RHD)       | Jurkat-NFATc1-ChIP-Seq(jolna_et_al)/Homer-ATTTCCATT      | -1.513793796     | 1.617841939  | -2.714548342 | -1.517291403 |
| NFE2    | 1248                         | 539.2   | 265.7   | 711.2   | 57.49     | NF-E2(bZIP)     | K562-NFE2-ChIP-Seq(GSE31477)/Homer-GATGACTCAGCA          | 1.544477022      | 0.427323482  | 3.988962084  | -2.483002888 |
| PRDM1   | 107.9                        | 42.93   | 3.007   | 65.48   | 1.97      | PRDM1(Zf)       | Hela-PRDM1-ChIP-Seq(GSE31477)/Homer-ACTTTCACTTTC         | 2.106212308      | -3.777671866 | 4.405158917  | -1.726749133 |
| RF2     | 321.5                        | 199.5   | 54.75   | 146.9   | 2.369     | Rf2(HTH)        | LoVo-RF2-ChIP-Seq(GSE49402)/Homer-GTTCAGTGGCAACM         | -0.49879608      | -0.038744047 | 1.65255326   | -0.153336768 |
| SRF     | 40.36                        | 3.676   | 7.25    | 4.055   | 9.26      | CaRg(MADS)      | PURF-Srf-ChIP-Seq(Sullivan_et_al)/Homer-CCATATATGGNM     | -1.665610439     | -0.035545137 | 1.818990922  | -0.40842777  |
| STAT3   | 12.34                        | 1.193   | 0.01234 | 46.1    | 0.02915   | Stat3(Stat)     | mES-Stat3-ChIP-Seq(GSE11431)/Homer-CTTCCGGGAA            | -0.957445361     | -0.460606485 | 1.98414647   | -1.219020204 |
| TFAP4   | 310.4                        | 390.5   | 172.4   | 108.3   | 62.33     | Ap4(bHLH)       | AML-Tfap4-ChIP-Seq(GSE45738)/Homer-NANCACTGD             | 0.776809942      | 1.283316966  | 3.248868211  | -5.217638628 |
| TFE3    | 17.81                        | 18.12   | 9.998   | 53.29   | 3.632     | TFE3(bHLH)      | MEF-TFE3-ChIP-Seq(GSE75757)/Homer-GTCACTGACYV            | -0.432356348     | -0.932236915 | 0.31564466   | 1.007204764  |
| TGIF1   | 350.4                        | 132.9   | 39.16   | 34.97   | 21.2      | Tgif1(Homeobox) | mES-Tgif1-ChIP-Seq(GSE55404)/Homer-YTGWCADY              | 1.572805597      | -0.018418658 | -0.927265033 | 0.129009178  |
| THAP11  | 18.05                        | 0.5761  | 5.731   | 38.37   | 2.48      | Rothin(THAP)    | ES-Thap11-ChIP-Seq(GSE51522)/Homer-RACTACAACCTCCAGVAKGC  | -1.74464697      | 0.730305116  | 0.38132055   | 1.25249739   |
| USF1    | 44.7                         | 80.92   | 8.983   | 109.8   | 2.457     | USF1(bHLH)      | GMI12878-USf1-ChIP-Seq(GSE32465)/Homer-SGTCACGTGR        | 1.416803814      | 0.521962305  | 0.3203321    | 0.902122885  |
| USF2    | 10.57                        | 45.4    | 36.59   | 102.4   | 2.23      | Usf2(bHLH)      | C2C12-Usf2-ChIP-Seq(GSE36030)/Homer-GTCACTGGT            | -3.239684838     | -0.582231405 | 2.217556034  | 0.769604529  |

**Supplemental Table 4: The representative co-precipitated proteins with LncRNA PCED1B-AS1 in erythroblasts identified by mass spectrometry.**

| Rank | Protein ID | Accession | -10lgP | Coverage (%) | #Peptides | Avg. Mass | Description                                                                           |
|------|------------|-----------|--------|--------------|-----------|-----------|---------------------------------------------------------------------------------------|
| 1    | 3890       | Q15149    | 312.33 | 19           | 78        | 531796    | Plectin OS=Homo sapiens OX=9606 GN=PLEC PE=1 SV=3                                     |
| 2    | 176        | Q08043    | 210.91 | 13           | 13        | 103241    | Alpha-actinin-3 OS=Homo sapiens OX=9606 GN=ACTN3 PE=1 SV=2                            |
| 3    | 559        | Q81UE6    | 206.81 | 48           | 11        | 13995     | Histone H2A type 2-B OS=Homo sapiens OX=9606 GN=HIST2H2AB PE=1 SV=3                   |
| 4    | 89         | A5A3E0    | 204.85 | 11           | 13        | 121444    | POTE ankyrin domain family member F OS=Homo sapiens OX=9606 GN=POTEF PE=1 SV=2        |
| 5    | 28         | Q13885    | 197.97 | 31           | 13        | 49907     | Tubulin beta-2A chain OS=Homo sapiens OX=9606 GN=TUBB2A PE=1 SV=1                     |
| 6    | 111        | Q9BYX7    | 189.8  | 19           | 9         | 42016     | Putative beta-actin-like protein 3 OS=Homo sapiens OX=9606 GN=POTEKP PE=5 SV=1        |
| 7    | 86         | P54652    | 188.84 | 14           | 11        | 70021     | Heat shock-related 70 kDa protein 2 OS=Homo sapiens OX=9606 GN=HSPA2 PE=1 SV=1        |
| 8    | 3904       | P16401    | 186.45 | 31           | 11        | 22580     | Histone H1.5 OS=Homo sapiens OX=9606 GN=HIST1H1B PE=1 SV=3                            |
| 9    | 3892       | O43390    | 180.97 | 21           | 10        | 70943     | Heterogeneous nuclear ribonucleoprotein R OS=Homo sapiens OX=9606 GN=HNRNPR PE=1 SV=1 |
| 10   | 345        | P17844    | 177.22 | 17           | 9         | 69148     | Probable ATP-dependent RNA helicase DDX5 OS=Homo sapiens OX=9606 GN=DDX5 PE=1 SV=1    |
| 50   | 3971       | P15976    | 112.01 | 8            | 2         | 42751     | Erythroid transcription factor OS=Homo sapiens OX=9606 GN=GATA1 PE=1 SV=1             |
| 259  | 4182       | Q93009    | 28.4   | 1            | 1         | 128302    | Ubiquitin carboxyl-terminal hydrolase 7 OS=Homo sapiens OX=9606 GN=USP7 PE=1 SV=2     |

**Supplemental Table 5:** TFs related to *DANCR* presented in promoter region of *DANCR*.

| Factor        | Biosource                        | All_peak_number | Overlap_peak_number | Overlap_ratio          |
|---------------|----------------------------------|-----------------|---------------------|------------------------|
| <b>CHD1</b>   | K562;Erythroblast;Bone Marrow    | 2476            | 2                   | 0.0008077544426494346  |
| <b>SRSF3</b>  | K562;Erythroblast;Bone Marrow    | 1786            | 1                   | 0.0005599104143337066  |
| <b>RUNX1</b>  | TF-1;Erythroblast;Bone Marrow    | 1861            | 1                   | 0.0005373455131649651  |
| <b>PCGF1</b>  | K562;Erythroblast;Bone Marrow    | 3135            | 1                   | 0.0003189792663476874  |
| <b>GTF2B</b>  | K562;Haematopoietic and lymphoid | 3257            | 1                   | 0.00030703101013202335 |
| <b>DPF1</b>   | K562;Erythroblast;Bone Marrow    | 3262            | 1                   | 0.00030656039239730225 |
| <b>SAP30</b>  | K562;Erythroblast;Bone Marrow    | 3283            | 1                   | 0.0003045994517209869  |
| <b>POLR2A</b> | K562;Erythroblast;Bone Marrow    | 4063            | 1                   | 0.0002461235540241201  |
| <b>ATF1</b>   | K562;Erythroblast;Bone Marrow    | 4226            | 1                   | 0.000236630383341221   |
| <b>GTF2E2</b> | K562;Erythroblast;Bone Marrow    | 4462            | 1                   | 0.00022411474675033618 |
| <b>ATF1</b>   | K562;Erythroblast;Bone Marrow    | 4684            | 1                   | 0.0002134927412467976  |
| <b>NRF1</b>   | K562;Erythroblast;Bone Marrow    | 4702            | 1                   | 0.0002126754572522331  |
| <b>SIN3A</b>  | K562;Erythroblast;Bone Marrow    | 4945            | 1                   | 0.00020222446916076846 |
| <b>BRD4</b>   | K562;Erythroblast;Bone Marrow    | 5055            | 1                   | 0.00019782393669634025 |
| <b>GTF2B</b>  | K562;Erythroblast;Bone Marrow    | 5161            | 1                   | 0.00019376089905057158 |
